# Supplementary material for: How Escherichia coli lands and forms cell clusters on a surface: a new role of surface topography
Source: PubMed Central journal article supplement (PMC4944170; doi:10.1038/srep29516), 2016-07-14
Supplement: srep29516-s3.pdf [file srep29516-s3.pdf]

## Supplementary Information

for

### **How *Escherichia coli* lands and forms cell clusters on a surface: a new role of surface topography**

Huan Gu<sup>1, 2, \*</sup>, Aaron Chen<sup>1, 2, \*, †</sup>, Xinran Song<sup>1, 2</sup>, Megan E. Brasch<sup>1, 2</sup>, James H. Henderson<sup>1, 2</sup>,  
and Dacheng Ren<sup>1, 2, 3, 4</sup>

<sup>1</sup>Department of Biomedical and Chemical Engineering, Syracuse University, Syracuse, NY 13244, USA.

<sup>2</sup>Syracuse Biomaterials Institute, Syracuse University, Syracuse, NY 13244, USA.

<sup>3</sup>Department of Civil and Environmental Engineering, Syracuse University, Syracuse, NY 13244, USA.

<sup>4</sup>Department of Biology, Syracuse University, Syracuse, NY 13244, USA.

Corresponding author:

Dacheng Ren: Phone 001-315- 443-4409. Fax 001-315- 443-9175. Email: [dren@syr.edu](mailto:dren@syr.edu)

\*These authors contributed equally

† Current address: Department of Mathematics, 310 Malott Hall, Cornell University, Ithaca, NY 14853, USA.

**Table S1. List of bacterial strains and plasmids used in this study.**

| Strain                              | Genotype                                                                                                                                                                                                             | Characteristics                                                     | Source/References |
|-------------------------------------|----------------------------------------------------------------------------------------------------------------------------------------------------------------------------------------------------------------------|---------------------------------------------------------------------|-------------------|
| <b><i>E. coli</i> strains</b>       |                                                                                                                                                                                                                      |                                                                     |                   |
| RP437                               | Wild type [ <i>thr-1 leuB6</i> (Am)<br><i>hisG4</i> (Oc) <i>fhuA31</i><br><i>metF159</i> (Am) <i>thiE1 rfbC1 eda-50</i><br><i>rpsL136</i> (strR) <i>araC14 mtl-1</i><br><i>xylA5 λ<sup>-</sup> tsx-78 lacY1 F-</i> ] | Wild type strain for biofilm study                                  | 1                 |
| RP3087                              | RP437 ( <i>motB</i> )580                                                                                                                                                                                             | Motility mutant (point mutation in the <i>motB</i> gene)            | 2                 |
| KX1485                              | RP437 $\Delta$ <i>luxS</i> ::Cm <sup>r</sup>                                                                                                                                                                         | Quorum sensing mutant, unable to synthesize AI-2                    | 3,4               |
| RHG01                               | RP437 $\Delta$ <i>fliC</i> ::Kan <sup>r</sup>                                                                                                                                                                        | Unable to synthesize the subunits of flagella                       | This study        |
| RHG02                               | RP437 $\Delta$ <i>fimA</i> ::Kan <sup>r</sup>                                                                                                                                                                        | Unable to synthesize the subunits of fimbriae                       | This study        |
| <b><i>P. aeruginosa</i> strains</b> |                                                                                                                                                                                                                      |                                                                     |                   |
| PA14                                | Wild type [Human clinical isolate; Rif <sup>r</sup> ]                                                                                                                                                                | Wild type strain for biofilm study                                  | 5,6               |
| PA1092                              | PA14 ( <i>fliC</i> )                                                                                                                                                                                                 | Flagellin type B transposon insertion mutant                        | 7                 |
| PA4526                              | PA14 ( <i>pilB</i> )                                                                                                                                                                                                 | Type 4 fimbrial biogenesis protein PilB transposon insertion mutant | 7                 |
| <b>Plasmids</b>                     |                                                                                                                                                                                                                      |                                                                     |                   |
| pRSH103                             | <i>rfp</i> , Tet <sup>r</sup>                                                                                                                                                                                        | To label the cells with constitutive red fluorescence for imaging   | 8                 |
| pRHG03                              | <i>motB</i> <sup>+</sup> , Tet <sup>r</sup>                                                                                                                                                                          | pRSH103 with <i>motB</i> gene controlled by <i>lac</i> promoter     | This study        |
| pRHG04                              | <i>fliC</i> <sup>+</sup> , Tet <sup>r</sup>                                                                                                                                                                          | pRSH103 with <i>fliC</i> gene controlled by <i>lac</i> promoter     | This study        |
| pRHG05                              | <i>fimA</i> <sup>+</sup> , Tet <sup>r</sup>                                                                                                                                                                          | pRSH103 with <i>fimA</i> gene controlled by <i>lac</i> promoter     | This study        |

**Table S2. Primers used for constructing the *E. coli* mutants.**

| <b>Target gene</b> | <b>Forward primer (5'-3')</b> | <b>Reverse primer (5'-3')</b> |
|--------------------|-------------------------------|-------------------------------|
| <i>fimA</i>        | ACCGTTCACCCGTTACGTTT          | TGCTCTTGTTTTTGCCCTGC          |
| <i>fliC</i>        | CGCCACTCATCGTAGGAGAA          | CCGAGACCTCCATACCGTTG          |

**Table S3. Primers used for complementing the *E. coli* mutants.**

| <b>Target gene</b> | <b>Forward primer (5'-3')</b>         | <b>Reverse primer (5'-3')</b>              |
|--------------------|---------------------------------------|--------------------------------------------|
| <i>motB</i>        | ATTTGCGGCCGCTGTGCGTGC<br>GGTGAAAAATC  | GGACTAGTCATGTCAGCCAACAG<br>TTCGTC          |
| <i>fliC</i>        | ATTTGCGGCCGCTAGCGGGAA<br>TAAGGGGCAGAG | ATTTGCGGCCGCGAGTCTCAGTTAA<br>TCAGGTTACAACG |
| <i>fimA</i>        | ATTTGCGGCCGCGCCAGTAAT<br>GCTGCTCGTTTT | GGACTAGTTTATCGCACAAAGGGT<br>GGGC           |

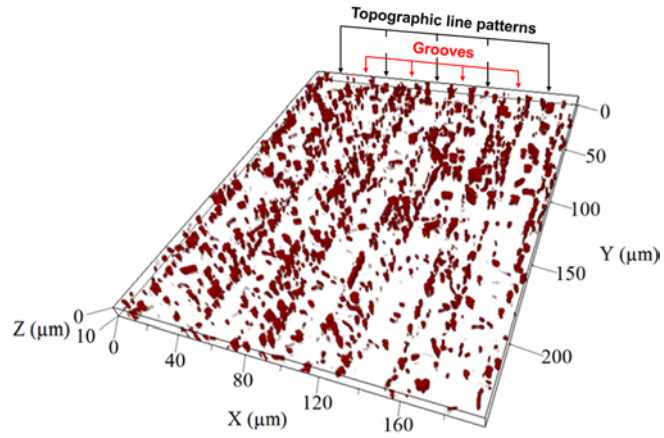

**Figure S1. Representative 3D fluorescence image of WT *E. coli* biofilm.** The image shows a PDMS surface modified with 20  $\mu\text{m}$  wide topographic line patterns with 20  $\mu\text{m}$  inter-pattern distance. The cells on top of protruding line patterns (5  $\mu\text{m}$  tall) are the focus of this study.

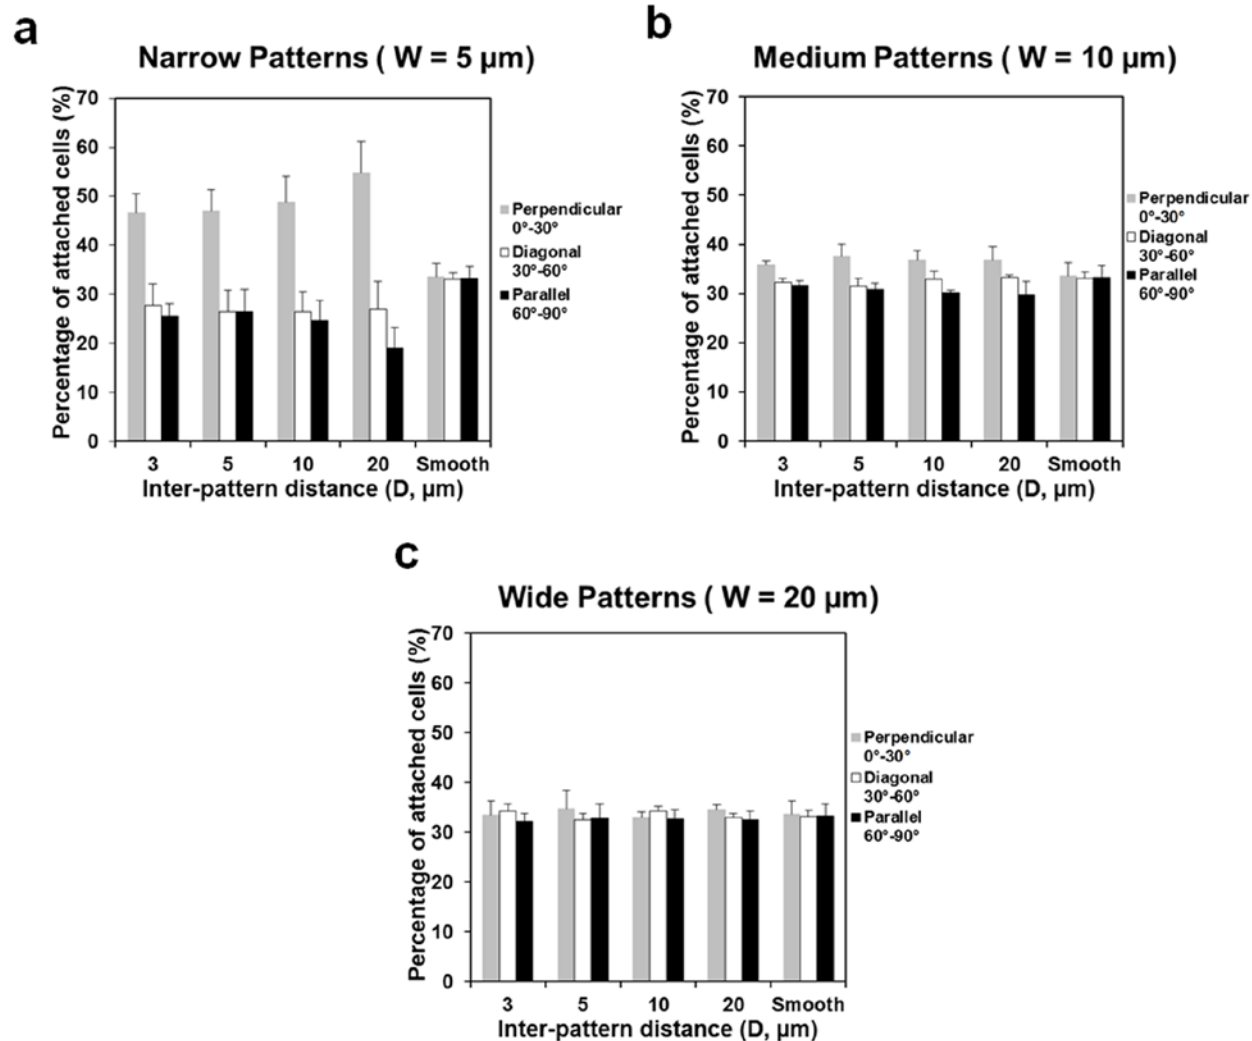

**Figure S2. Orientation of the WT *E. coli* cells attached on top of PDMS line patterns at 24 h after inoculation** (mean  $\pm$  standard error shown; at least three biological replicates were tested for each sample). Distribution of cell orientation on top of (a) narrow (5  $\mu\text{m}$  wide), (b) medium (10  $\mu\text{m}$  wide), and (c) wide (20  $\mu\text{m}$  wide) PDMS line patterns.

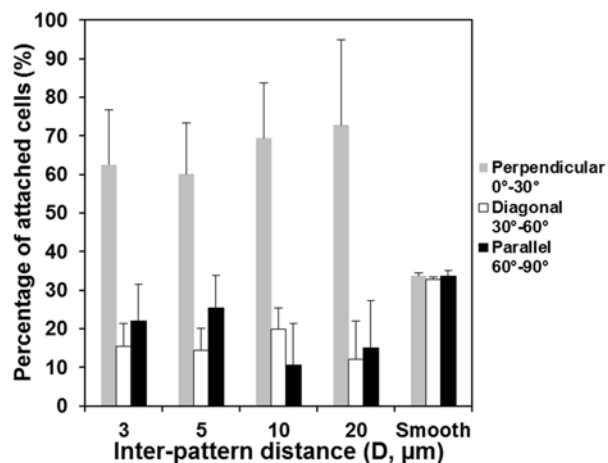

**Figure S3. Orientation of WT *E. coli* cells on top of 5  $\mu\text{m}$  wide line patterns and smooth PDMS surfaces after 2 h of attachment** (mean  $\pm$  standard error shown; at least three biological replicates were tested for each sample).

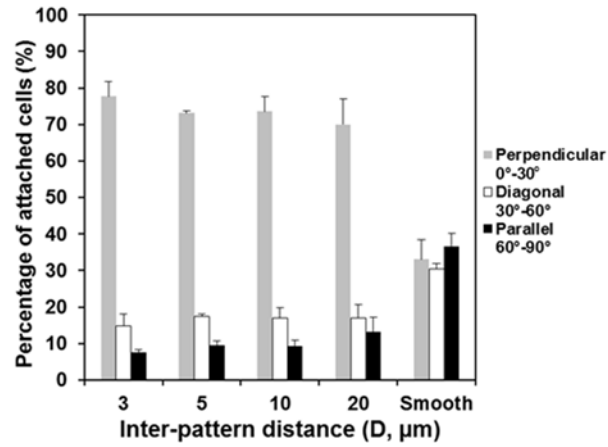

**Figure S4. Orientation of WT *E. coli* cells on top of face-down 5  $\mu\text{m}$  wide line patterns and smooth PDMS surfaces at 24 h after inoculation** (mean  $\pm$  standard error shown; at least three biological replicates were tested for each sample).



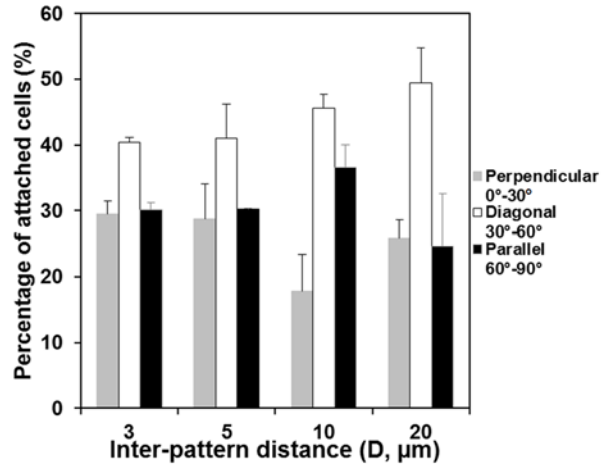

**Figure S5. Orientation of WT *E. coli* cells on top of 5 μm wide line patterns after 24 h of culturing** (mean ± standard error shown; at least three biological replicates were tested for each sample). Seeding cells were pretreated with 10 μg/mL chloramphenicol for 1 h before inoculation.

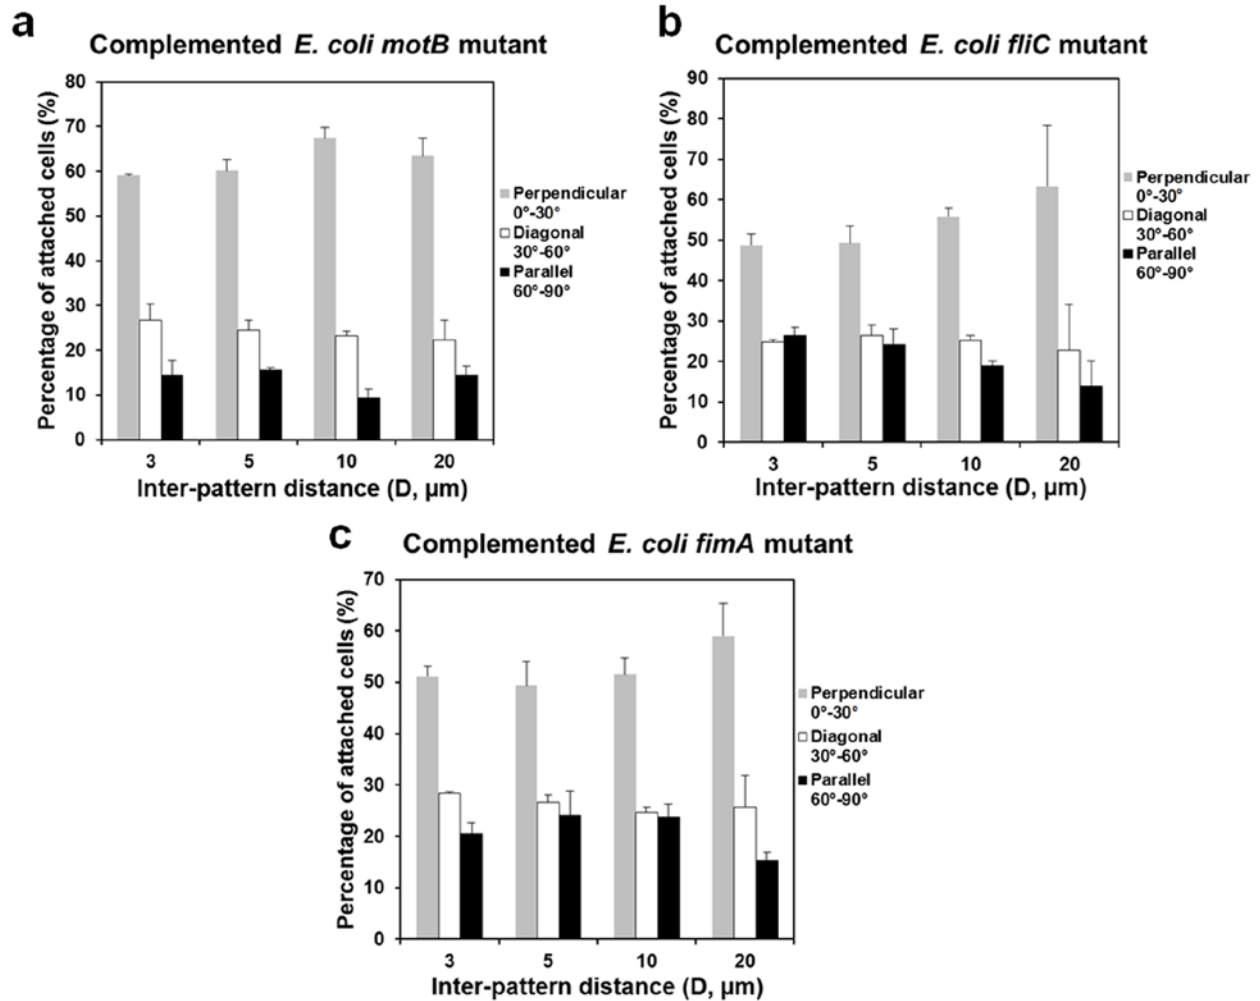

**Figure S6. Distribution of cell orientation on top of 5  $\mu\text{m}$  wide line patterns** (mean  $\pm$  standard error shown; at least three biological replicates were tested for each sample). (a) The complemented *motB* mutant *E. coli* RP3087/pRHG03. (b) The complemented *fliC* mutant *E. coli* RHG01/pRHG04. (c) The complemented *fimA* mutant *E. coli* RHG02/pRHG05.

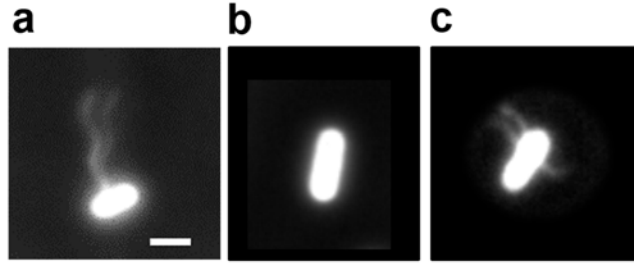

**Figure S7. Fluorescence images of the planktonic cells showing flagella-like structures.** The images show the cells of the WT *E. coli* (a) and its mutants of *fliC* (b) and *fimA* (c) genes. The cells harvested from planktonic cultures ( $OD_{600} = 0.6$ ) were stained with Alexa Fluor® 594 NHS Ester (Succinimidyl Ester) Bar = 2  $\mu\text{m}$ .

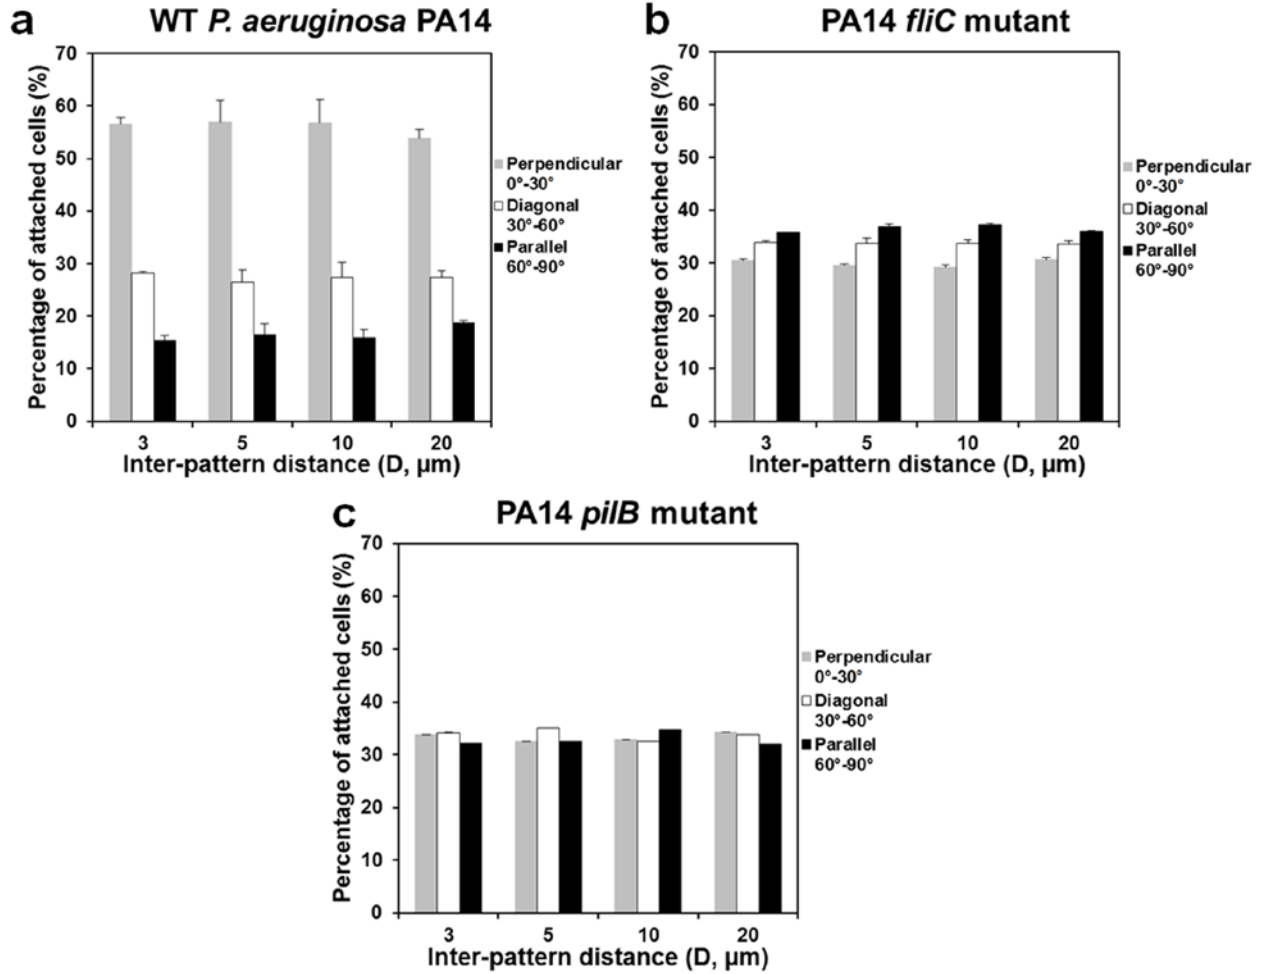

**Figure S8. Distribution of cell orientations on top of 5  $\mu\text{m}$  wide line patterns** (mean  $\pm$  standard error shown; at least three biological replicates were tested for each sample). **(a)** Wild-type *P. aeruginosa* strain PA14. **(b)**  $\Delta fliC$  mutant of *P. aeruginosa* PA14 (PA1092). **(c)**  $\Delta pilB$  mutant of *P. aeruginosa* PA14 (PA4526).

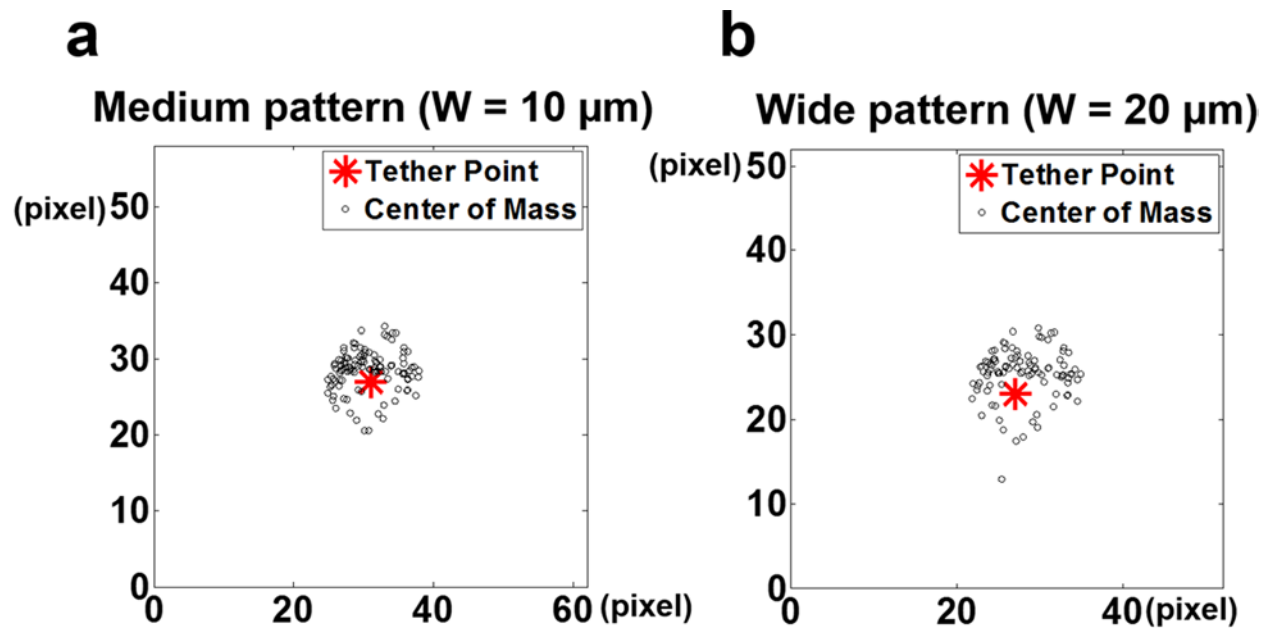

**Figure S9. Rotation trajectories of cells tethered on top of medium (a) and wide (b) line patterns.** The unit of x and y-axis is  $0.16 \mu\text{m}/\text{pixel}$ . The images were taken with 1.6 s interval between every two frames.

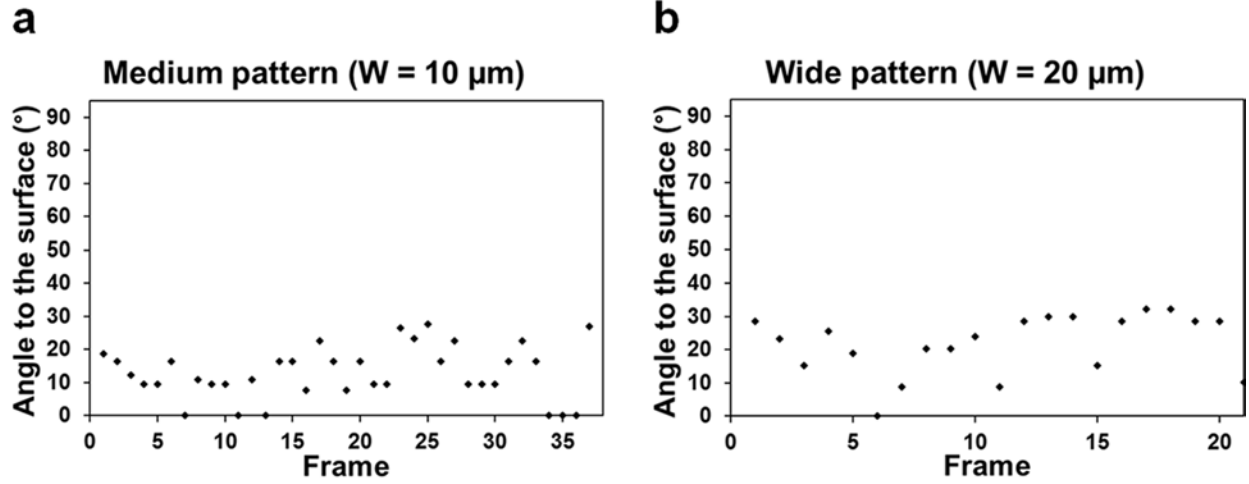

**Figure S10.** The angle between cell body and the substratum surface (x-y plane) of WT *E. coli* cells tethered on the top of medium (a) and wide (b) line patterns. The images were taken with 1.6 s interval between every two frames.

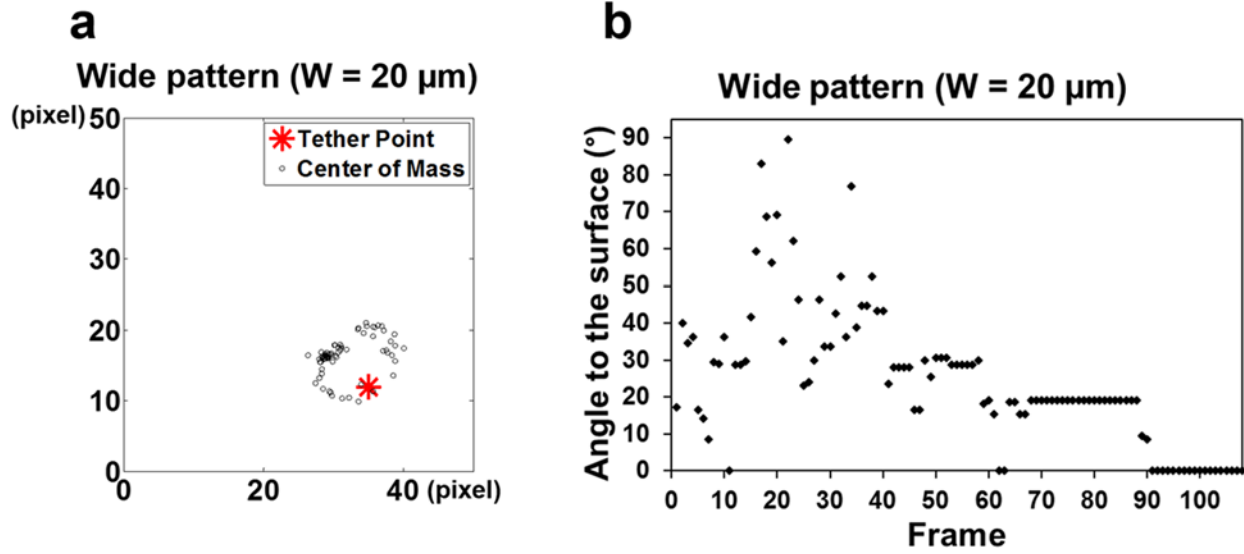

**Figure S11. Rotation trajectory (a; unit of x and y-axis is  $0.16 \mu\text{m}/\text{pixel}$ ) and the angle between cell body and the substratum surface (x-y plane) (b) of a cell tethered on the vertical side of a wide line pattern.** The cell rotation pattern was still a circle but was not centered around the tether point. The images were taken with 1.6 s interval between every two frames.

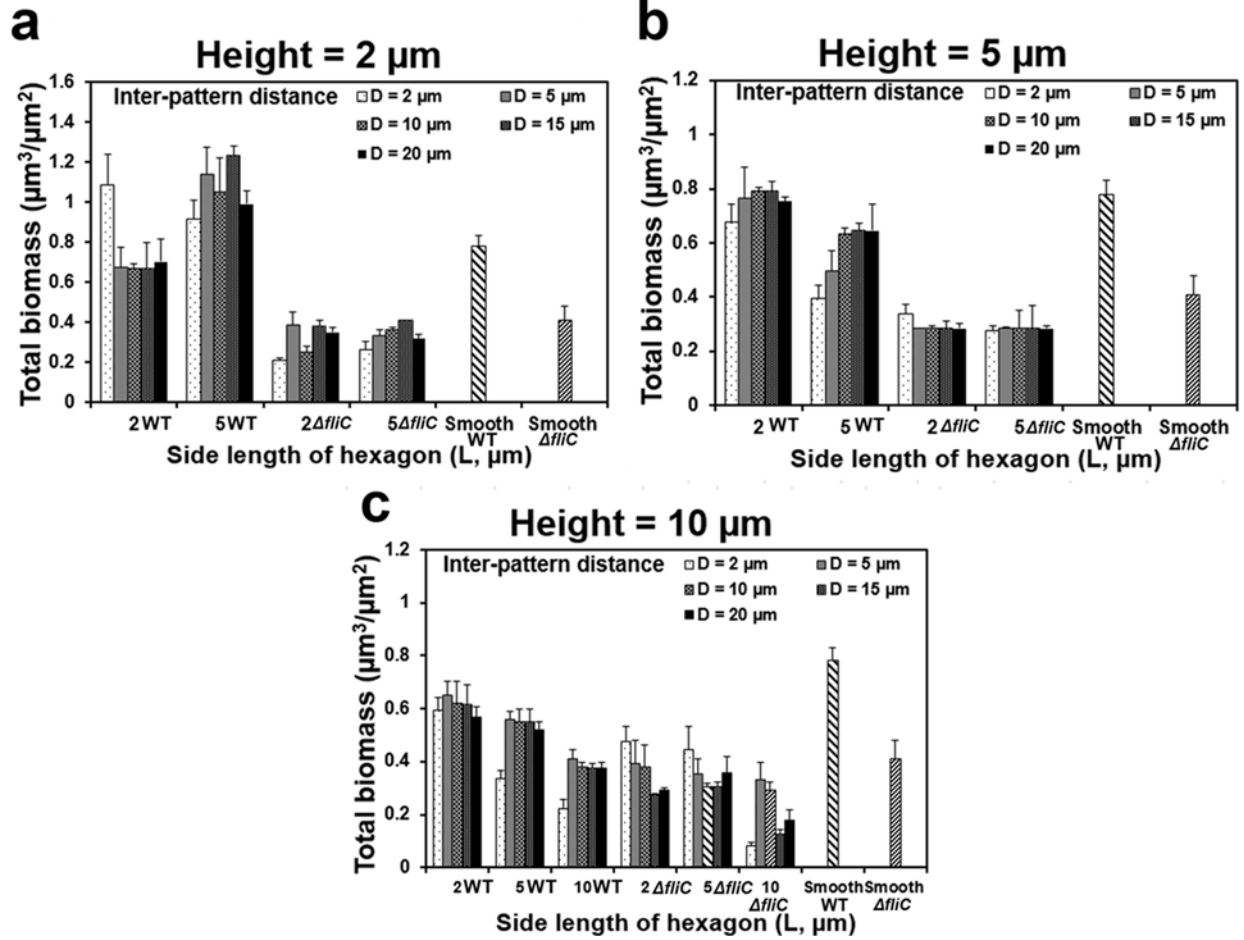

**Figure S12. Biofilm formation of the WT *E. coli* and its isogenic *fliC* mutant on PDMS surfaces modified with hexagon shaped topographic patterns** (mean  $\pm$  standard error shown; at least three biological replicates were tested for each sample). The graphs show the biomass of biofilms on surfaces modified with 2 (a), 5 (b), or 10 (c)  $\mu\text{m}$  tall hexagon shaped patterns with varied side length (2, 5, or 10  $\mu\text{m}$ ) and inter-pattern distance (2, 5, 10, 15, or 20  $\mu\text{m}$ ).



**Movie S1. Rotation of a WT *E. coli* cell tethered on top of a 20  $\mu\text{m}$  wide protruding line.** The cell shape (circled in red) was automatically detected by ACTIVE. The movie shows that the center of cell mass followed a regular circle during rotation (based on images collected over 198 s). A few other cells were also seen with short presence during the movie. These are planktonic cells and not the focus of this study.

**Movie S2. Rotation of WT *E. coli* cells on the edge of a narrow (5  $\mu\text{m}$  wide) protruding line.** The movie shows that the cell body moved in an irregular pattern (based on images collected over 41 s).

## References:

- 1 Parkinson, J. S. & Houts, S. E. Isolation and behavior of *Escherichia coli* deletion mutants lacking chemotaxis functions. *J. Bacteriol.* **151**, 106-113 (1982).
- 2 Blair, D. F., Kim, D. Y. & Berg, H. C. Mutant MotB proteins in *Escherichia coli*. *J. Bacteriol.* **173**, 4049-4055 (1991).
- 3 Diao, J. P., *et al.* A Three-channel microfluidic device for generating static linear gradients and its application to the quantitative analysis of bacterial chemotaxis. *Lab Chip* **6**, 381-388 (2006).
- 4 Park, S. *et al.* Influence of topology on bacterial social interaction. *Proc. Natl. Acad. Sci. USA* **100**, 13910-13915, (2003).
- 5 Rahme, L. G. *et al.* Common virulence factors for bacterial pathogenicity in plants and animals. *Science* **268**, 1899-1902, (1995).
- 6 Choi, J. Y. *et al.* Identification of virulence genes in a pathogenic strain of *Pseudomonas aeruginosa* by representational difference analysis. *J. Bacteriol.* **184**, 952-961 (2002).
- 7 Liberati, N. T., *et al.* An ordered, nonredundant library of *Pseudomonas aeruginosa* strain PA14 transposon insertion mutants. *Proc. Natl. Acad. Sci. USA* **103**, 19931-19931, (2006).
- 8 Hou, S., Gu, H., Smith, C. & Ren, D. Microtopographic patterns affect *Escherichia coli* biofilm formation on poly(dimethylsiloxane) surfaces. *Langmuir* **27**, 2686-91 (2011).
